# Supplementary material for: Temperature dependence of one-dimensional hydrogen bonding in morpholinium hydrogen chloranilate studied by 35Cl nuclear quadrupole resonance and multi-temperature X-ray diffraction
Source: Royal Society of Chemistry journal article supplement (doi:10.1039/c2cp41241a), 2012-01-01
Supplement: c2cp41241a.pdf [file c2cp41241a.pdf]

Table 1S (a) Hydrogen-bond geometry (Å, °).

| D—H...A                    | D—H       | H...A     | D...A      | D—H...A   |
|----------------------------|-----------|-----------|------------|-----------|
| 114 K                      |           |           |            |           |
| N1—H1A...O4                | 0.908(16) | 1.934(17) | 2.8109(12) | 161.6(15) |
| N1—H1B...O1 <sup>iv</sup>  | 0.892(15) | 2.137(16) | 2.9324(11) | 148.2(14) |
| N1—H1B...O2 <sup>iii</sup> | 0.892(15) | 2.230(17) | 2.9408(12) | 136.4(13) |
| O2—H2...O4                 | 0.825(16) | 1.70(2)   | 2.4643(9)  | 154(2)    |
| O4—H4...O2                 | 0.836(19) | 1.68(3)   | 2.4643(9)  | 156(3)    |
| 120 K                      |           |           |            |           |
| N1—H1A...O4                | 0.914(16) | 1.930(17) | 2.8126(12) | 161.8(15) |
| N1—H1B...O1 <sup>iv</sup>  | 0.891(15) | 2.137(16) | 2.9314(11) | 148.0(14) |
| N1—H1B...O2 <sup>iii</sup> | 0.891(15) | 2.228(17) | 2.9408(12) | 136.6(13) |
| O2—H2...O4                 | 0.822(16) | 1.70(2)   | 2.4661(9)  | 154(2)    |
| O4—H4...O2                 | 0.838(19) | 1.68(3)   | 2.4661(9)  | 156(3)    |
| 130 K                      |           |           |            |           |
| N1—H1A...O4                | 0.912(16) | 1.934(17) | 2.8165(12) | 161.9(15) |
| N1—H1B...O1 <sup>iv</sup>  | 0.902(15) | 2.127(16) | 2.9288(11) | 147.7(14) |
| N1—H1B...O2 <sup>iii</sup> | 0.902(15) | 2.220(17) | 2.9402(12) | 136.5(13) |
| O2—H2...O4                 | 0.823(16) | 1.70(2)   | 2.4695(9)  | 154(2)    |
| O4—H4...O2                 | 0.838(19) | 1.68(3)   | 2.4695(9)  | 155(3)    |
| 145 K                      |           |           |            |           |
| N1—H1A...O4                | 0.917(16) | 1.930(17) | 2.8207(12) | 162.4(15) |
| N1—H1B...O1 <sup>iv</sup>  | 0.897(15) | 2.128(16) | 2.9272(12) | 147.9(14) |
| N1—H1B...O2 <sup>iii</sup> | 0.897(15) | 2.225(17) | 2.9403(12) | 136.4(13) |
| O2—H2...O4                 | 0.821(17) | 1.71(2)   | 2.4747(9)  | 153(2)    |
| O4—H4...O2                 | 0.835(19) | 1.69(3)   | 2.4882(11) | 155(3)    |
| 160 K                      |           |           |            |           |
| N1—H1A...O4                | 0.910(16) | 1.943(17) | 2.8244(12) | 163.4(16) |
| N1—H1B...O1 <sup>iv</sup>  | 0.904(15) | 2.122(16) | 2.9250(12) | 147.8(14) |
| N1—H1B...O2 <sup>iii</sup> | 0.904(15) | 2.225(17) | 2.9412(12) | 136.0(13) |
| O2—H2...O4                 | 0.821(17) | 1.72(2)   | 2.4787(10) | 154(2)    |
| O4—H4...O2                 | 0.837(19) | 1.70(3)   | 2.4787(10) | 154(3)    |
| 180 K                      |           |           |            |           |
| N1—H1A...O4                | 0.910(16) | 1.948(17) | 2.8277(13) | 162.8(15) |
| N1—H1B...O1 <sup>iv</sup>  | 0.901(15) | 2.120(16) | 2.9235(12) | 147.7(14) |
| N1—H1B...O2 <sup>iii</sup> | 0.903(17) | 2.222(17) | 2.9429(13) | 136.5(13) |
| O2—H2...O4                 | 0.820(17) | 1.72(2)   | 2.4836(10) | 154(3)    |
| O4—H4...O2                 | 0.835(19) | 1.71(3)   | 2.4836(10) | 155(3)    |
| 200 K                      |           |           |            |           |
| N1—H1A...O4                | 0.904(16) | 1.955(17) | 2.8318(13) | 162.2(16) |
| N1—H1B...O1 <sup>iv</sup>  | 0.909(16) | 2.117(16) | 2.9224(12) | 147.4(14) |
| N1—H1B...O2 <sup>iii</sup> | 0.907(17) | 2.220(18) | 2.9445(13) | 136.5(13) |
| O2—H2...O4                 | 0.812(17) | 1.73(2)   | 2.4882(11) | 154(2)    |
| O4—H4...O2                 | 0.832(17) | 1.72(3)   | 2.4882(11) | 152(3)    |

Symmetry codes: (iii) 1-x,1-y,1-z ; (iv) 1+x,y,-1+z.

Table 1S (b) Selected crystal data and experimental details for morpholinium hydrogen chloranilate at 338 K

|                                                                                                |              |              |             |
|------------------------------------------------------------------------------------------------|--------------|--------------|-------------|
| Temperature (K)                                                                                | 338          |              |             |
| $a$ , $b$ , $c$ (Å)                                                                            | 8.66982(18), | 9.21282(19), | 9.26605(19) |
| $\alpha$ , $\beta$ , $\gamma$ (°)                                                              | 92.6113(7),  | 116.6498(7), | 113.4563(7) |
| Volume (Å <sup>3</sup> ), $Z$ , $D_{\text{calc}}$ (g cm <sup>-3</sup> )                        | 583.72(2),   | 2,           | 1.685       |
| $q_{\text{max}}$                                                                               | 30.0         |              |             |
| $N_{\text{total}}$ , $N_{\text{unique}}$ , $R_{\text{int}}$                                    | 17198,       | 3389,        | 0.026       |
| $N_{\text{reflections}}$ , $N_{\text{parameters}}$                                             | 3389,        | 177          |             |
| $R[F^2 > 2s(F^2)]$ , $wR(F^2)$ , $S$                                                           | 0.0364,      | 0.0984,      | 1.12        |
| $\Delta\rho_{\text{max}}$ (e Å <sup>-3</sup> ), $\Delta\rho_{\text{min}}$ (e Å <sup>-3</sup> ) | 0.35, -0.70  |              |             |

Table 1S (c) Hydrogen-bond geometry (Å, °) determined at 338 K

| D—H...A                    | D—H     | H...A   | D...A      | D—H...A   |
|----------------------------|---------|---------|------------|-----------|
| N1—H1A...O4                | 0.93(3) | 1.96(3) | 2.8612(17) | 162(2)    |
| N1—H1B...O1 <sup>iv</sup>  | 0.93(2) | 2.08(3) | 2.9156(17) | 149.1(17) |
| N1—H1B...O2 <sup>iii</sup> | 0.93(2) | 2.23(2) | 2.9573(18) | 134.6(19) |
| O2—H2...O4                 | 0.81(3) | 1.79(4) | 2.5078(13) | 148(4)    |
| O4—H4...O2                 | 0.82(3) | 1.80(3) | 2.5078(13) | 144(4)    |

Symmetry codes: (iii) 1-x,1-y,1-z ; (iv) 1+x,y,-1+z.
